# Supplementary material for: Urban–rural differentials in age-related biological risk among middle-aged and older Chinese
Source: Springer Nature journal article supplement (doi:10.1007/s00038-018-1189-0), 2018-12-08
Supplement: MOESM1 [file 16327246]

**Urban-Rural Differentials in Age-Related Biological Risk among Middle-Aged and Older Chinese**

**Appendix: Selection of Analytic Sample and Missing Data Analysis**

For the China Health and Retirement Longitudinal Study (CHARLS), 17,708 respondents were interviewed in 2011. Our analytic sample for this study includes 8,499 persons, 50% of the total respondents. The reasons respondents are missing from our analytic sample are shown in Figure A below. CHARLS interviews individuals 45+ and their spouses regardless of age. We first excluded those who were below age 45 when interviewed and those who did not provide age or their birth dates (N=418). Among the 17,290 age-eligible respondents, the primary reason that individuals were not included in the analytic sample was that they did not provide blood in a subsequent visit to a clinic (N=7,362). In addition, the analytic sample includes only those who fasted overnight (a reduction of 1,009), and those with no data missing on any of the biomarkers (N=407) and key covariates (N=13).

Figure A. Sample Inclusion Criteria

All Respondents in China Health and Retirement Longitudinal Study 2011-12 (N=17,708)

Respondents aged 45+

(N=17,290)

Respondents who provided blood samples (N=9,928)

Fasting samples

(N=8,919)

407 respondents have missing values for at least one of the included biomarkers;

13 respondents have missing values for gender and urban-rural.

Analytic sample

(N=8,499)

We ran a weighted logistic regression using the CHARLS 2011 person-level weights to examine whether the respondents who were excluded from this study differed from the analytic sample. Odds ratios and significance are reported in Table A1.

| Table A1. Weighted Logistic Regression Model Predicting Being Excluded from the Analytic Sample, China Health and Retirement Longitudinal Study, China, 2011-12 (N=17,708) | | |
| --- | --- | --- |
|  | Odds Ratios (SE) | |
| Age | 1.00 (0.00) | *** |
| Female | 0.85 (0.05) | * |
| Education (ref=Illiterate) |  |  |
| Literate without schooling | 0.88 (0.07) |  |
| Primary school | 0.90 (0.08) |  |
| Junior school or higher | 1.05 (0.09) |  |
| Urban-Rural (Ref=Rural residency) |  |  |
| Urban residency, rural hukou | 1.44 (0.20) | ** |
| Urban residency, urban hukou | 2.25 (0.23) | *** |
| Significance: ** p<0.05, **p<0.01, ***p<0.001* |  |  |

Respondents who were excluded from the analytic sample are more likely to be male and urban residents. No significant age or educational differences are observed.

Individuals were excluded from the analytic sample primarily because they did not provide a blood sample. In our analysis, we applied the biomarker weight to account for the fact that men and urban respondents were less likely to provide blood so that they are more likely to be excluded from the final analytic sample.

We then excluded those who did not provide a blood sample and compared the characteristics of those who were in the sample to the characteristics of those who were excluded from the analytic sample. We applied the biomarker weights to account for nonresponse in blood data collection. We also conducted a stratified analysis of missing data by urban-rural status. Results are reported in Table A2.

| Table A2. Weighted Logistic Regression Model Predicting Being Excluded from Analytic Sample, China Health and Retirement Longitudinal Study, 2011-12 | | | | | | | |
| --- | --- | --- | --- | --- | --- | --- | --- |
|  | Full Sample | | Rural residency | | | Urban residency | Urban residency |
| rural hukou | urban hukou |
|  | OR (SE) | | OR (SE) | | | OR (SE) | OR (SE) |
| Age | 0.99 (0.01) | * | 0.99 (0.01) | * | | 0.99 (0.02) | 1.00 (0.01) |
| Female | 0.94 (0.07) |  | 0.99 (0.08) |  | | 0.98 (0.13) | 0.93 (0.15) |
| Education (ref=Illiterate) | | | | | | | |
| Literate without schooling | 0.93 (0.11) |  | 1.01 (0.12) | |  | 0.65 (0.32) | 0.67 (0.32) |
| Primary school | 0.88 (0.14) |  | **1.05 (0.15)** | |  | **0.78 (0.25)** | **0.59 (0.37)** |
| Junior school or higher | 0.90 (0.14) |  | **1.00 (0.14)** | |  | **0.64 (0.33)** | **0.79 (0.36)** |
| Urban-Rural (Ref=Rural residency) | | | | | | | |
| Urban residency, rural hukou | 0.89 (0.16) |  |  | |  |  |  |
| Urban residency, urban hukou | 1.73 (0.26) | *** |  | |  |  |  |
| Significance: ** p<0.05, **p<0.01, ***p<0.001* | | | | | | | |

After applying the biomarker weights, we find that advanced age is associated with somewhat lower probability of being excluded; urban residents with urban hukou are more likely to be excluded compared to rural residents. Among the rural population, only being older is associated with a slightly lower probability of being excluded from the analytic sample (OR=0.99, significant at 5% level). Among the two urban-residency groups, the illiterate have a lower probability of being excluded compared to those who were illiterate, but the differences are not statistically significant due to relatively smaller sample size and large standard errors.

Because questions on physical activities were asked only for a random half sample, Models 3 and 4 use respondents in this random half sample. We conducted a logistic regression to examine whether respondents who answered the question on physical activities differ from those who did not receive the questions and thus were excluded from Models 3 and 4. Odds ratios are reported in Table A3.

| Table A3. Weighted Logistic Regression Model Predicting Being Excluded from Models 3 & 4, China Health and Retirement Longitudinal Study, China, 2011-12 (N=8,460) | | |
| --- | --- | --- |
|  | Odds Ratio (SE) | |
| Age | 1.00 (0.00) |  |
| Female | 0.98 (0.08) |  |
| Education (ref=Illiterate) |  |  |
| Literate without schooling | 1.02 (0.09) |  |
| Primary school | 1.06 (0.13) |  |
| Junior school or higher | 1.04 (0.11) |  |
| Urban-Rural (Ref=Rural residency) | |  |
| Urban residency, rural hukou | 0.86 (0.11) |  |
| Urban residency, urban hukou | 1.14 (0.24) |  |
| Per capita expenditure (ref=bottom tertile) | | |
| Top tertile | 0.84 ().07) | * |
| 2nd tertile | 0.97 (0.08) |  |
| Ever smoke | 1.06 (0.13) |  |
| Drink (ref=nondrinkers) |  |  |
| Moderate drinkers | 0.98 (0.12) |  |
| Heavy drinkers | 1.22 (0.22) |  |
| Community infrastructure (ref=least deficient) | | |
| Somewhat deficient | 0.81 (0.12) |  |
| Deficient | 0.91 (0.13) |  |
| Most deficient | 1.01 (0.15) |  |
| Number of biological risks | 1.06 (0.04) |  |
| *Significance: *p<0.05* |  |  |

Respondents who were excluded from Models 3 and 4 were not significantly different from those who were in the first two models, except that those in the top tertile of per capita expenditures were more likely to provide information on functioning. However, as shown in Table 3 (Models 3 and 4), per capita expenditure is not significantly correlated with biological risk.
